# Supplementary material for: Interpretable machine learning for investigating complex nanomaterial–plant–soil interactions
Source: Royal Society of Chemistry journal article supplement (doi:10.1039/d2en00181k), 2022-01-01
Supplement: d2en00181k1.xlsx [file d2en00181k1.xlsx]

## Sheet: RCF
MONP composition	Plant subclass	Size (nm)	Surface charge (mV)	Concentration (mg/kg)	SOM (%)	Clay (%)	Exposure time (days)	RCF
ZnO	Asteridae	68	-10	900	1.13	39	35	0.227778
ZnO	Asteridae	68	-10	900	1.13	39	35	0.288889
ZnO	Asteridae	68	-10	450	1.13	39	35	0.355556
ZnO	Asteridae	68	-10	450	1.13	39	35	0.555556
ZnO	Asteridae	68	-10	225	1.13	39	35	0.666667
ZnO	Asteridae	68	-10	225	1.13	39	35	0.977778
ZnO	Asteridae	43	-10.5	100	4.15	31.9	21	2
ZnO	Asteridae	68	-10	20	1.13	39	35	4
ZnO	Asteridae	68	-10	20	1.69	18	35	7.5
ZnO	Asteridae	68	-10	20	1.13	39	35	10.25
CuO	Asteridae	60	-34.4	500	3.08	15	90	0.3
CuO	Asteridae	60	-34.4	250	3.08	15	90	0.52
CuO	Asteridae	60	-34.4	150	2.8	19	70	0.8
CuO	Asteridae	60	-34.4	62.5	3.08	15	90	1.52
ZnO	Caryophyllidae	68	-10	900	1.13	39	35	0.222222
ZnO	Caryophyllidae	68	-10	450	1.13	39	35	0.422222
ZnO	Caryophyllidae	68	-10	225	1.13	39	35	0.622222
ZnO	Caryophyllidae	68	-10	900	1.69	18	35	3.66667
ZnO	Caryophyllidae	68	-10	20	1.13	39	35	5
ZnO	Caryophyllidae	68	-10	450	1.69	18	35	5.11111
ZnO	Caryophyllidae	68	-10	225	1.69	18	35	8
ZnO	Commelinidae	10	-12.4	800	0.04	3.73	30	0.325
ZnO	Commelinidae	10	-12.4	400	0.04	3.73	30	0.625
ZnO	Commelinidae	43	-10.5	100	4.15	31.9	60	0.95
ZnO	Commelinidae	68	-10	20	1.13	39	35	1.5
CeO2	Commelinidae	8	-2.39	400	0.04	3.7	84	0.27625
CeO2	Commelinidae	8	-2.39	800	0.04	3.7	84	0.494875
ZnO	Commelinidae	24	-2.22	800	0.04	3.7	84	1.34125
ZnO	Commelinidae	24	-2.22	400	0.04	3.7	84	2.8825
CuO	Commelinidae	16.3	13.8	50	1.1	13	84	0.16
CuO	Commelinidae	43	-10.5	100	4.15	31.9	88	0.37
CuO	Commelinidae	43	-10.5	500	4.15	31.9	60	0.45
CuO	Commelinidae	43	-10.5	500	4.15	31.9	21	0.46
CuO	Commelinidae	43	-10.5	1000	4.15	31.9	21	0.56
CuO	Commelinidae	43	-10.5	50	4.15	31.9	88	0.7
CuO	Commelinidae	10	-12.4	200	0.04	3.73	30	0.95
CuO	Commelinidae	43	-10.5	500	4.15	31.9	7	1.36
CuO	Commelinidae	43	-10.5	1000	4.15	31.9	7	1.49
CuO	Commelinidae	68	-10	20	1.69	18	35	2
CuO	Commelinidae	43	-10.5	50	4.15	31.9	60	2
CuO	Commelinidae	43	-10.5	100	4.15	31.9	7	2.6
CuO	Commelinidae	43	-10.5	50	4.15	31.9	21	3.2
CuO	Commelinidae	43	-10.5	50	4.15	31.9	7	4.8
ZnO	Commelinidae	68	-10	900	1.13	39	35	0.833333
ZnO	Commelinidae	68	-10	450	1.13	39	35	1.15556
ZnO	Commelinidae	68	-10	900	1.13	39	35	1.31111
ZnO	Commelinidae	68	-10	225	1.13	39	35	1.55556
ZnO	Commelinidae	68	-10	450	1.13	39	35	1.86667
ZnO	Commelinidae	68	-10	225	1.13	39	35	3.02222
ZnO	Commelinidae	68	-10	900	1.69	18	35	3.22222
ZnO	Commelinidae	68	-10	900	1.69	18	35	3.33333
ZnO	Commelinidae	68	-10	450	1.69	18	35	4.66667
ZnO	Commelinidae	68	-10	20	1.69	18	35	5
ZnO	Commelinidae	68	-10	225	1.69	18	35	5.33333
ZnO	Commelinidae	68	-10	450	1.69	18	35	6.22222
ZnO	Commelinidae	68	-10	20	1.13	39	35	7
ZnO	Commelinidae	68	-10	225	1.69	18	35	8.44444
ZnO	Commelinidae	68	-10	20	1.13	39	35	13
ZnO	Commelinidae	25	-21.6	100	0.92	10	125	1.35
ZnO	Commelinidae	25	-21.6	75	0.92	10	125	1.6
ZnO	Commelinidae	25	-21.6	50	0.92	10	125	2.1
ZnO	Commelinidae	25	-21.6	25	0.92	10	125	3.8
CuO	Commelinidae	30	-20	10	3.9	4.2	18	8.13
CuO	Commelinidae	30	-20	10	3.9	4.2	131	8.87
CuO	Commelinidae	30	-20	5	3.9	4.2	131	11.34
CuO	Commelinidae	30	-20	5	3.9	4.2	18	15.2
CuO	Commelinidae	30	-20	1	3.9	4.2	18	16
CeO2	Commelinidae	40.28	-10.33	100	12.7	10.94	30	0.22
CeO2	Commelinidae	40.28	-10.33	500	12.7	10.94	30	0.32
CeO2	Commelinidae	40.28	-10.33	50	12.7	10.94	30	0.4
CuO	Commelinidae	30.73	-5.41	500	12.7	10.94	30	0.47
ZnO	Commelinidae	24.52	-11.44	500	12.7	10.94	30	0.48
CuO	Commelinidae	30.73	-5.41	100	12.7	10.94	30	0.5
CuO	Commelinidae	30.73	-5.41	50	12.7	10.94	30	0.6
ZnO	Commelinidae	24.52	-11.44	100	12.7	10.94	30	1.5
ZnO	Commelinidae	24.52	-11.44	50	12.7	10.94	30	3.2
CeO2	Dilleniidae	8	7.5	800	0.04	3.7	53	0.689
CeO2	Dilleniidae	8	7.5	400	0.04	3.7	53	0.7935
ZnO	Dilleniidae	10	-12.4	800	0.04	3.7	53	2.6875
ZnO	Dilleniidae	10	-12.4	400	0.04	3.7	53	3.54
ZnO	Dilleniidae	68	-10	900	1.13	39	35	0.188889
ZnO	Dilleniidae	68	-10	450	1.13	39	35	0.311111
ZnO	Dilleniidae	68	-10	225	1.13	39	35	0.444444
ZnO	Dilleniidae	68	-10	900	1.13	39	35	0.577778
ZnO	Dilleniidae	68	-10	450	1.13	39	35	0.866667
ZnO	Dilleniidae	68	-10	225	1.13	39	35	1.42222
ZnO	Dilleniidae	68	-10	20	1.13	39	35	4
ZnO	Dilleniidae	68	-10	900	1.69	18	35	5.66667
ZnO	Dilleniidae	68	-10	450	1.69	18	35	9.11111
ZnO	Dilleniidae	68	-10	20	1.13	39	35	9.5
ZnO	Dilleniidae	68	-10	20	1.69	18	35	10
ZnO	Dilleniidae	68	-10	20	1.69	18	35	10
ZnO	Dilleniidae	68	-10	225	1.69	18	35	13.3333
CuO	Dilleniidae	60	-34.4	600	2.8	19	70	0.258333
CuO	Dilleniidae	60	-34.4	300	2.8	19	70	0.5
CuO	Dilleniidae	60	-34.4	125	3.08	15	90	0.8
CuO	Dilleniidae	60	-34.4	600	2.8	19	70	0.8
CuO	Dilleniidae	60	-34.4	300	2.8	19	70	1.3
CuO	Dilleniidae	60	-34.4	150	2.8	19	70	1.53333
CuO	Dilleniidae	60	-34.4	75	2.8	19	70	1.53333
CuO	Dilleniidae	60	-34.4	75	2.8	19	70	2.33333
ZnO	Rosidae	67	46.1	500	3.268	30	80	2.006
CeO2	Rosidae	8	2.19	250	4.2	5	52	0.072
CeO2	Rosidae	8	2.19	62.5	4.2	5	52	0.08
CeO2	Rosidae	8	2.19	125	4.2	5	52	0.096
ZnO	Rosidae	68	-10	900	1.13	39	35	0.0888889
ZnO	Rosidae	68	-10	900	1.13	39	35	0.111111
ZnO	Rosidae	68	-10	225	1.13	39	35	0.133333
ZnO	Rosidae	68	-10	450	1.13	39	35	0.177778
ZnO	Rosidae	68	-10	450	1.13	39	35	0.2
ZnO	Rosidae	68	-10	225	1.13	39	35	0.888889
ZnO	Rosidae	68	-10	900	1.69	18	35	1.16667
ZnO	Rosidae	10	-12.4	100	0.04	3.73	30	1.5
ZnO	Rosidae	68	-10	225	1.69	18	35	1.77778
ZnO	Rosidae	68	-10	20	1.13	39	35	2
ZnO	Rosidae	68	-10	450	1.69	18	35	2.44444
ZnO	Rosidae	68	-10	20	1.69	18	35	2.5
ZnO	Rosidae	68	-10	900	1.69	18	35	4.33333
ZnO	Rosidae	68	-10	225	1.69	18	35	7.11111
ZnO	Rosidae	68	-10	450	1.69	18	35	7.33333
ZnO	Rosidae	68	-10	20	1.69	18	35	10
CuO	Rosidae	50	-52	200	1.59	26	120	0.09
CuO	Rosidae	25	-52	200	1.59	26	120	0.11
CuO	Rosidae	50	-52	100	1.59	26	120	0.125
CuO	Rosidae	25	-52	100	1.59	26	120	0.19
CuO	Rosidae	50	-52	50	1.59	26	120	0.21
CuO	Rosidae	25	-52	50	1.59	26	120	0.25
CeO2	Rosidae	16.3	13.8	100	1.1	13	84	0.12
CeO2	Rosidae	16.3	13.8	200	1.1	13	84	0.13
CeO2	Rosidae	43	-10.5	500	4.15	31.9	88	0.16
