# Supplementary material for: Interpretable machine learning for investigating complex nanomaterial–plant–soil interactions
Source: Royal Society of Chemistry journal article supplement (doi:10.1039/d2en00181k), 2022-01-01
Supplement: d2en00181k2.pdf [file d2en00181k2.pdf]

Supplementary Information

**Interpretable machine learning for investigating complex nanomaterial-plant-soil interactions**

Hengjie Yu,<sup>a</sup> Zhilin Zhao,<sup>a</sup> Dan Luo<sup>b</sup> and Fang Cheng<sup>\*a</sup>

<sup>a</sup> College of Biosystems Engineering and Food Science, Zhejiang University, Hangzhou 310058, P.R. China

<sup>b</sup> Department of Biological and Environmental Engineering, Cornell University, Ithaca, New York, 14853, USA

\*Contact details: E-mail: [fcheng@zju.edu.cn](mailto:fcheng@zju.edu.cn)

Tel.: +86 571 88982713

**Table S1** The version numbers for the main software used in this study.

| <b>Software</b> | <b>Version</b> |
|-----------------|----------------|
| Python          | 3.8.10         |
| scikit-learn    | 0.24.2         |
| lightGBM        | 3.2.1.99       |
| shap            | 0.39.0         |
| PDPbox          | 0.2.0          |
| imodels         | 1.2.5          |

**Table S2** Final values of grid-search hyperparameters of LightGBM models for different dataset split.

|                                          | random state | min_data_in_leaf | min_sum_hessian_in_leaf | max_bin | max_depth | num_leaves | learning_rate |
|------------------------------------------|--------------|------------------|-------------------------|---------|-----------|------------|---------------|
| RCF_rando<br>m split                     | 1            | 16               | 1                       | 9       | 2         | 4          | 0.070         |
|                                          | 2            | 16               | 1                       | 5       | 4         | 5          | 0.096         |
|                                          | 3            | 12               | 1                       | 11      | 5         | 6          | 0.052         |
|                                          | 4            | 1                | 16                      | 5       | 4         | 5          | 0.097         |
|                                          | 5            | 1                | 14                      | 6       | 3         | 4          | 0.088         |
|                                          | 6            | 1                | 16                      | 8       | 2         | 4          | 0.083         |
|                                          | 7            | 1                | 17                      | 5       | 3         | 4          | 0.067         |
|                                          | 8            | 1                | 18                      | 8       | 3         | 4          | 0.095         |
|                                          | 9            | 1                | 17                      | 15      | 3         | 4          | 0.087         |
|                                          | 10           | 1                | 18                      | 9       | 2         | 3          | 0.081         |
| log(RCF)_ra<br>ndom split                | 1            | 1                | 15                      | 7       | 4         | 5          | 0.094         |
|                                          | 2            | 1                | 12                      | 13      | 4         | 6          | 0.075         |
|                                          | 3            | 1                | 12                      | 18      | 3         | 6          | 0.067         |
|                                          | 4            | 1                | 14                      | 23      | 3         | 4          | 0.083         |
|                                          | 5            | 16               | 1                       | 14      | 4         | 5          | 0.090         |
|                                          | 6            | 12               | 1                       | 12      | 3         | 6          | 0.048         |
|                                          | 7            | 8                | 1                       | 14      | 7         | 10         | 0.043         |
|                                          | 8            | 1                | 17                      | 6       | 3         | 4          | 0.094         |
|                                          | 9            | 1                | 17                      | 23      | 3         | 4          | 0.096         |
|                                          | 10           | 11               | 1                       | 14      | 2         | 4          | 0.044         |
| log(RCF)_st<br>ratified<br>shuffle split | 1            | 1                | 7                       | 22      | 5         | 9          | 0.013         |
|                                          | 2            | 1                | 11                      | 20      | 3         | 7          | 0.062         |
|                                          | 3            | 16               | 1                       | 9       | 4         | 5          | 0.095         |
|                                          | 4            | 1                | 14                      | 23      | 4         | 5          | 0.085         |
|                                          | 5            | 1                | 13                      | 11      | 3         | 6          | 0.080         |
|                                          | 6            | 1                | 15                      | 13      | 3         | 5          | 0.068         |
|                                          | 7            | 1                | 17                      | 9       | 3         | 4          | 0.095         |
|                                          | 8            | 14               | 1                       | 8       | 4         | 5          | 0.065         |
|                                          | 9            | 12               | 1                       | 6       | 5         | 6          | 0.090         |
|                                          | 10           | 1                | 15                      | 7       | 4         | 5          | 0.084         |

\*Note: Hyperparameters tuning is employed in four steps for reducing computation cost, including min\_data\_in\_leaf and min\_sum\_hessian\_in\_leaf, max\_bin, max\_depth

and `num_leaves`, and `learning_rate`. For all models, the hyperparameters of `n_estimators`, `n_jobs`, and `max_cat_to_onehot` are set to 1000, -1, and 6 respectively.

Default values are used for other hyperparameters that are not listed.

**Table S3** All decision rules generated by the RuleFit algorithm where categorical features had been one-hot encoded.

| Type                                                                                                                    | Decision rule                                                                                                                                              | Coefficient | Support | Importance |
|-------------------------------------------------------------------------------------------------------------------------|------------------------------------------------------------------------------------------------------------------------------------------------------------|-------------|---------|------------|
| Linear                                                                                                                  | Plant subclass_Dilleniidae                                                                                                                                 | 0.0759      | 1.0000  | 0.0293     |
|                                                                                                                         | Plant subclass_Rosidae                                                                                                                                     | -0.0513     | 1.0000  | 0.0219     |
| Rule                                                                                                                    | SOM (%) <= 4.025 and SOM (%) > 1.64                                                                                                                        | 0.2561      | 0.2885  | 0.1160     |
|                                                                                                                         | Plant subclass_Commelinidae <= 0.5 and Concentration (mg/kg) > 37.5 and SOM (%) <= 3.034 and Clay (%) > 18.5 and MONP composition_CeO2 <= 0.5              | -0.2436     | 0.2692  | 0.1080     |
|                                                                                                                         | Surface charge (mV) > -43.2 and Concentration (mg/kg) <= 475.0 and MONP composition_CeO2 <= 0.5                                                            | 0.2250      | 0.6538  | 0.1070     |
|                                                                                                                         | Surface charge (mV) <= -7.705 and Concentration (mg/kg) <= 62.5                                                                                            | 0.2432      | 0.2596  | 0.1066     |
|                                                                                                                         | Concentration (mg/kg) > 37.5 and Exposure time (days) > 25.5 and MONP composition_ZnO <= 0.5                                                               | -0.1703     | 0.3077  | 0.0786     |
|                                                                                                                         | Surface charge (mV) > -10.25 and Concentration (mg/kg) > 35.0 and Clay (%) <= 35.45 and MONP composition_ZnO > 0.5                                         | 0.2146      | 0.1442  | 0.0754     |
|                                                                                                                         | Plant subclass_Rosidae > 0.5                                                                                                                               | -0.1441     | 0.2404  | 0.0616     |
|                                                                                                                         | Surface charge (mV) <= -0.015 and Surface charge (mV) > -43.2 and Plant subclass_Commelinidae <= 0.5 and Concentration (mg/kg) > 375.0 and Clay (%) > 18.5 | -0.1604     | 0.1250  | 0.0531     |
|                                                                                                                         | Concentration (mg/kg) > 37.5 and SOM (%) > 2.245 and Exposure time (days) > 14.0                                                                           | -0.1067     | 0.2692  | 0.0473     |
|                                                                                                                         | Size (nm) <= 64.0 and Surface charge (mV) > -43.2 and Concentration (mg/kg) <= 475.0 and Concentration (mg/kg) > 37.5 and Clay (%) <= 35.45                | -0.0967     | 0.3173  | 0.0450     |
|                                                                                                                         | Plant subclass_Rosidae > 0.5 and Concentration (mg/kg) > 35.0 and Exposure time (days) > 32.5                                                              | -0.1033     | 0.2019  | 0.0415     |
|                                                                                                                         | Concentration (mg/kg) > 37.5 and Exposure time (days) > 82.0 and MONP composition_ZnO <= 0.5                                                               | -0.0971     | 0.1346  | 0.0332     |
|                                                                                                                         | Surface charge (mV) > -43.2 and Concentration (mg/kg) > 37.5 and Exposure time (days) > 25.5                                                               | -0.0626     | 0.7019  | 0.0286     |
|                                                                                                                         | Concentration (mg/kg) > 337.5 and Exposure time (days) <= 43.5                                                                                             | -0.0603     | 0.2885  | 0.0273     |
|                                                                                                                         | Exposure time (days) <= 19.5 and MONP composition_ZnO <= 0.5                                                                                               | 0.1073      | 0.0673  | 0.0269     |
|                                                                                                                         | Concentration (mg/kg) > 37.5 and SOM (%) > 2.245 and Exposure time (days) <= 79.0 and MONP composition_CeO2 <= 0.5                                         | 0.0649      | 0.2019  | 0.0260     |
|                                                                                                                         | Plant subclass_Dilleniidae <= 0.5 and Plant subclass_Rosidae <= 0.5 and Concentration (mg/kg) <= 475.0 and Concentration (mg/kg) > 35.0                    | -0.0545     | 0.3269  | 0.0256     |
|                                                                                                                         | Plant subclass_Commelinidae <= 0.5 and Concentration (mg/kg) > 35.0 and SOM (%) <= 1.64 and Clay (%) > 18.0                                                | -0.0608     | 0.2212  | 0.0252     |
|                                                                                                                         | Concentration (mg/kg) <= 337.5 and Exposure time (days) <= 43.5                                                                                            | 0.0517      | 0.3654  | 0.0249     |
|                                                                                                                         | Surface charge (mV) > -43.2 and Concentration (mg/kg) <= 325.0 and Concentration (mg/kg) > 35.0 and MONP composition_CeO2 > 0.5                            | -0.1079     | 0.0481  | 0.0231     |
| Plant subclass_Commelinidae <= 0.5 and Concentration (mg/kg) > 35.0 and Clay (%) <= 28.5 and MONP composition_ZnO > 0.5 | 0.0719                                                                                                                                                     | 0.1154      | 0.0230  |            |

|                                                                                                                                                                                                                         |         |        |        |
|-------------------------------------------------------------------------------------------------------------------------------------------------------------------------------------------------------------------------|---------|--------|--------|
| Plant subclass_Rosidae <= 0.5 and Concentration (mg/kg) <= 375.0 and Clay (%) > 18.5 and MONP composition_CeO2 <= 0.5                                                                                                   | 0.0491  | 0.2404 | 0.0210 |
| Plant subclass_Dilleniidae <= 0.5 and Concentration (mg/kg) <= 425.0 and Concentration (mg/kg) > 37.5 and MONP composition_CeO2 <= 0.5                                                                                  | -0.0438 | 0.3558 | 0.0210 |
| Size (nm) <= 63.5 and Concentration (mg/kg) > 62.5 and SOM (%) > 1.64 and Exposure time (days) > 25.5                                                                                                                   | -0.0551 | 0.1731 | 0.0208 |
| Plant subclass_Rosidae <= 0.5 and Concentration (mg/kg) <= 450.0 and Concentration (mg/kg) > 35.0 and SOM (%) <= 8.425 and Exposure time (days) <= 77.0 and Exposure time (days) > 25.5 and MONP composition_ZnO <= 0.5 | 0.0825  | 0.0673 | 0.0207 |
| Concentration (mg/kg) > 35.0 and SOM (%) <= 1.41 and Exposure time (days) <= 43.5                                                                                                                                       | -0.0476 | 0.2308 | 0.0201 |
| Surface charge (mV) <= -10.415 and Concentration (mg/kg) > 200.0 and SOM (%) > 2.245                                                                                                                                    | -0.0661 | 0.0962 | 0.0195 |
| Plant subclass_Rosidae <= 0.5 and Concentration (mg/kg) <= 237.5                                                                                                                                                        | 0.0365  | 0.4038 | 0.0179 |
| Exposure time (days) > 19.5 and MONP composition_ZnO <= 0.5                                                                                                                                                             | -0.0369 | 0.3365 | 0.0175 |
| Concentration (mg/kg) <= 475.0 and MONP composition_CeO2 <= 0.5                                                                                                                                                         | 0.0370  | 0.7115 | 0.0168 |
| Surface charge (mV) > -43.2 and Plant subclass_Dilleniidae > 0.5 and Concentration (mg/kg) > 35.0 and SOM (%) <= 2.245 and Clay (%) <= 35.45 and MONP composition_CeO2 <= 0.5                                           | 0.0769  | 0.0481 | 0.0164 |
| Concentration (mg/kg) > 56.25 and Clay (%) <= 35.45 and Exposure time (days) > 32.5 and MONP composition_ZnO > 0.5                                                                                                      | 0.0379  | 0.1923 | 0.0149 |
| Size (nm) <= 67.5 and Concentration (mg/kg) > 37.5 and Clay (%) <= 30.95 and MONP composition_ZnO > 0.5                                                                                                                 | 0.0463  | 0.1154 | 0.0148 |
| Size (nm) <= 63.5 and Concentration (mg/kg) > 56.25 and SOM (%) > 1.64                                                                                                                                                  | -0.0329 | 0.2404 | 0.0141 |
| Concentration (mg/kg) > 200.0 and SOM (%) > 2.245 and Clay (%) <= 24.5                                                                                                                                                  | -0.0453 | 0.0865 | 0.0127 |
| Concentration (mg/kg) > 37.5 and Exposure time (days) > 82.0                                                                                                                                                            | -0.0313 | 0.1731 | 0.0118 |
| Surface charge (mV) > -7.705 and Concentration (mg/kg) <= 237.5 and Concentration (mg/kg) > 37.5                                                                                                                        | -0.0464 | 0.0481 | 0.0099 |
| Plant subclass_Rosidae > 0.5 and Clay (%) > 34.5 and MONP composition_ZnO > 0.5                                                                                                                                         | -0.0425 | 0.0577 | 0.0099 |
| Concentration (mg/kg) > 35.0 and Clay (%) <= 35.45 and Exposure time (days) > 25.5 and MONP composition_ZnO <= 0.5                                                                                                      | -0.0209 | 0.3077 | 0.0097 |
| Surface charge (mV) > -43.2 and Concentration (mg/kg) <= 312.5 and Concentration (mg/kg) > 37.5 and Clay (%) <= 35.45 and MONP composition_CeO2 > 0.5                                                                   | -0.0411 | 0.0481 | 0.0088 |
| Concentration (mg/kg) <= 5.5                                                                                                                                                                                            | 0.0604  | 0.0192 | 0.0083 |
| Size (nm) > 30.0 and Plant subclass_Rosidae > 0.5 and Concentration (mg/kg) > 37.5 and SOM (%) <= 1.64 and MONP composition_CeO2 <= 0.5                                                                                 | -0.0304 | 0.0769 | 0.0081 |
| Surface charge (mV) > -10.25 and Concentration (mg/kg) > 37.5 and Clay (%) <= 35.45 and MONP composition_ZnO > 0.5                                                                                                      | 0.0156  | 0.1442 | 0.0055 |
| Concentration (mg/kg) > 37.5 and SOM (%) > 1.64 and MONP composition_ZnO <= 0.5                                                                                                                                         | -0.0127 | 0.2500 | 0.0055 |
| Surface charge (mV) <= -10.415 and Concentration (mg/kg) <= 200.0 and                                                                                                                                                   | 0.0150  | 0.1250 | 0.0050 |

|                                                                                                                                              |         |        |        |
|----------------------------------------------------------------------------------------------------------------------------------------------|---------|--------|--------|
| Concentration (mg/kg) > 37.5 and SOM (%) > 2.245                                                                                             |         |        |        |
| Size (nm) <= 30.0 and Plant subclass_Rosidae > 0.5 and Concentration (mg/kg) > 37.5 and SOM (%) <= 1.64 and MONP composition_CeO2 <= 0.5     | 0.0213  | 0.0385 | 0.0041 |
| Plant subclass_Rosidae > 0.5 and Concentration (mg/kg) > 56.25 and MONP composition_ZnO <= 0.5                                               | -0.0138 | 0.0769 | 0.0037 |
| Size (nm) <= 9.0 and Surface charge (mV) > -43.2 and Concentration (mg/kg) <= 475.0 and Concentration (mg/kg) > 35.0                         | -0.0128 | 0.0481 | 0.0027 |
| Concentration (mg/kg) > 56.25 and SOM (%) <= 4.175 and Exposure time (days) > 43.5                                                           | 0.0062  | 0.2500 | 0.0027 |
| Surface charge (mV) > -43.2 and Plant subclass_Commelinidae <= 0.5 and Concentration (mg/kg) > 37.5 and Clay (%) > 35.45                     | -0.0060 | 0.1635 | 0.0022 |
| Clay (%) <= 18.5 and MONP composition_CeO2 <= 0.5 and Plant subclass_Asteridae <= 0.5                                                        | 0.0043  | 0.3462 | 0.0020 |
| Plant subclass_Commelinidae <= 0.5 and Concentration (mg/kg) > 37.5 and Clay (%) > 35.45 and MONP composition_ZnO > 0.5                      | -0.0055 | 0.1635 | 0.0020 |
| Concentration (mg/kg) > 47.5 and SOM (%) <= 1.41 and Exposure time (days) <= 44.0 and MONP composition_ZnO > 0.5                             | -0.0044 | 0.2212 | 0.0018 |
| Concentration (mg/kg) > 56.25 and SOM (%) <= 1.41 and Exposure time (days) <= 43.5                                                           | -0.0021 | 0.2308 | 0.0009 |
| Plant subclass_Commelinidae <= 0.5 and Concentration (mg/kg) > 37.5 and SOM (%) > 3.034 and Clay (%) > 18.5 and MONP composition_CeO2 <= 0.5 | 0.0037  | 0.0192 | 0.0005 |
| Concentration (mg/kg) <= 325.0 and Concentration (mg/kg) > 37.5 and MONP composition_CeO2 > 0.5                                              | -0.0022 | 0.0481 | 0.0005 |
| Plant subclass_Commelinidae > 0.5 and Plant subclass_Rosidae <= 0.5 and Concentration (mg/kg) > 37.5 and SOM (%) <= 8.425                    | -0.0003 | 0.2596 | 0.0001 |
| Concentration (mg/kg) > 37.5 and SOM (%) > 1.64 and Clay (%) <= 7.97                                                                         | -0.0006 | 0.0288 | 0.0001 |

---

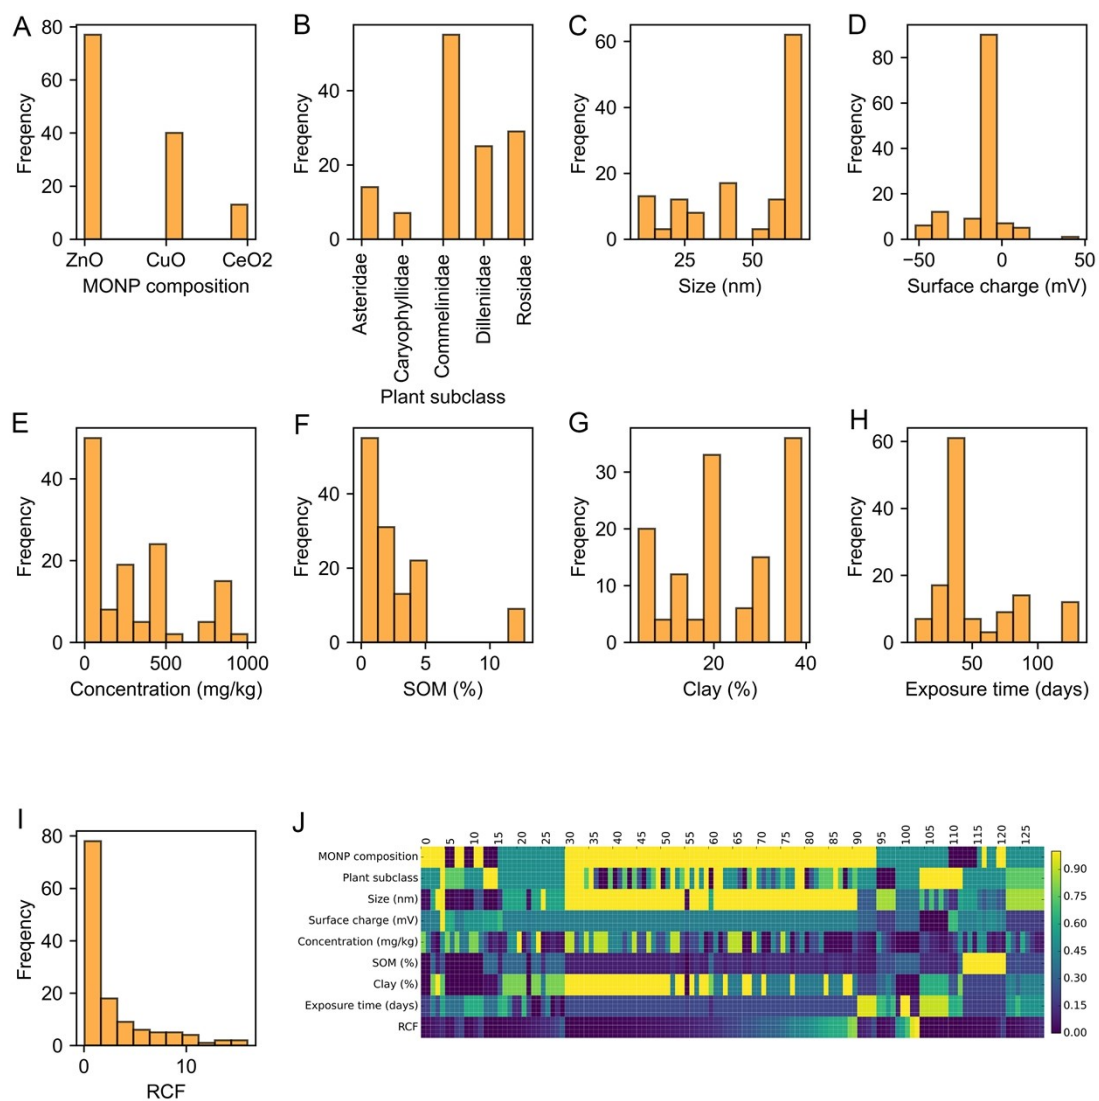

**Fig. S1** Data distribution of features (A-H) and raw predicted target (I). (J) Data visualization of this dataset where the features and RCF are normalized to the 0-1 range.



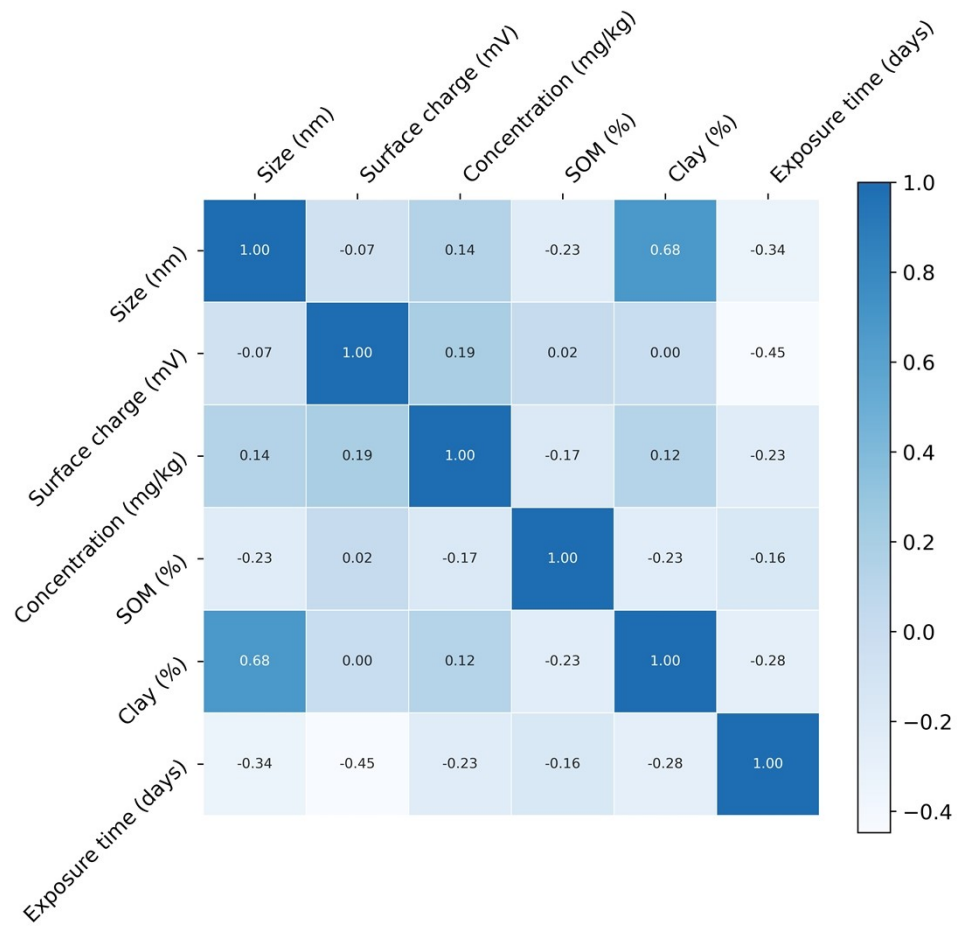

**Fig. S2** Pearson correlation coefficient among numerical features.

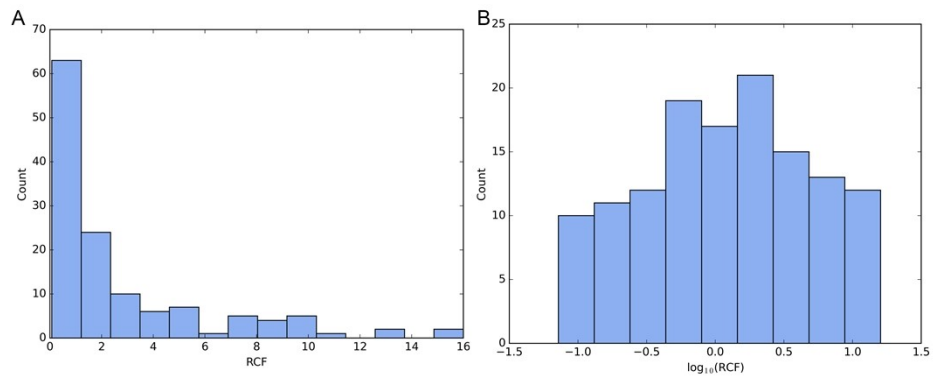

**Fig. S3** Data distribution of RCF before (A) and after (B) logarithm transform.

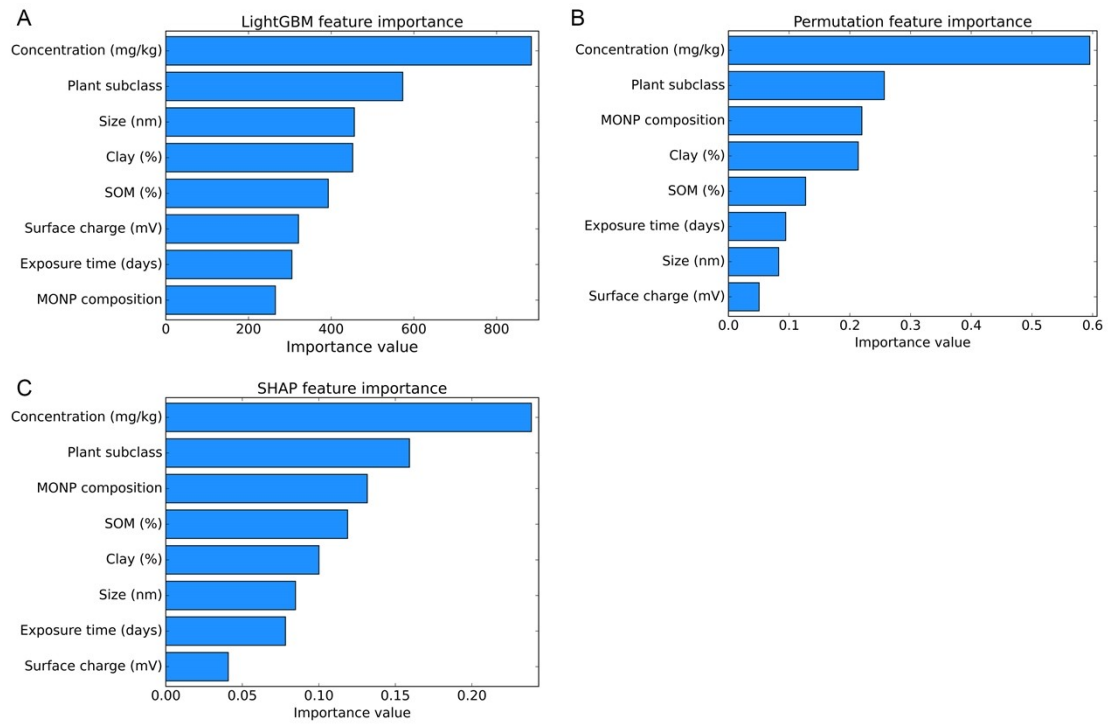

**Fig. S4** Absolute feature importance of three measurement methods in the first dataset split.

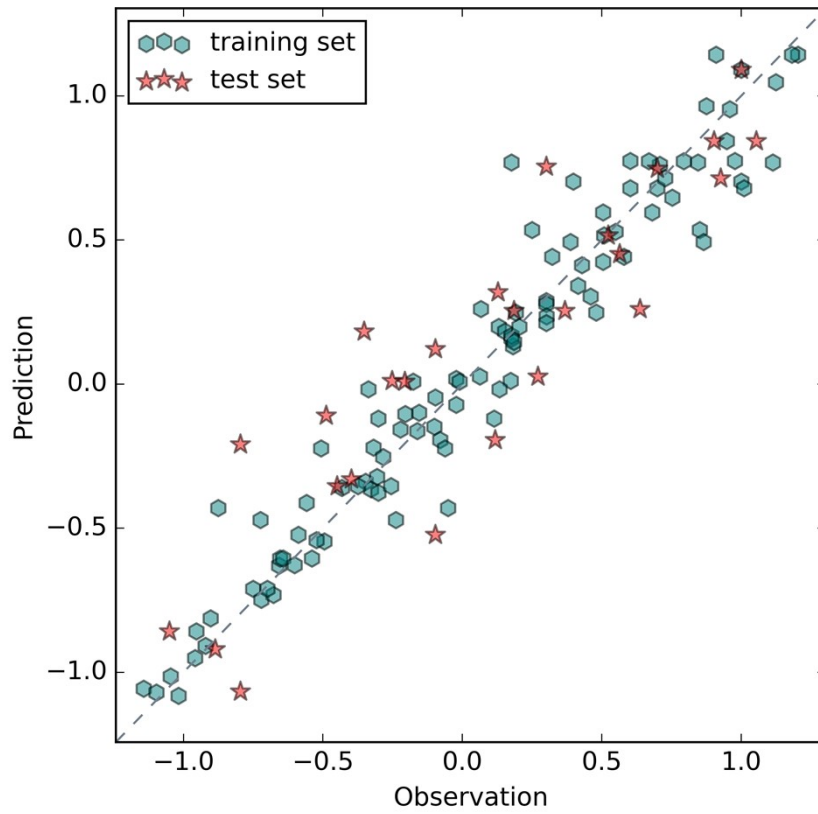

**Fig. S5** Predicted versus observed logarithm transform of RCF values of the LightGBM model based on the sixth dataset split (stratified shuffle split).

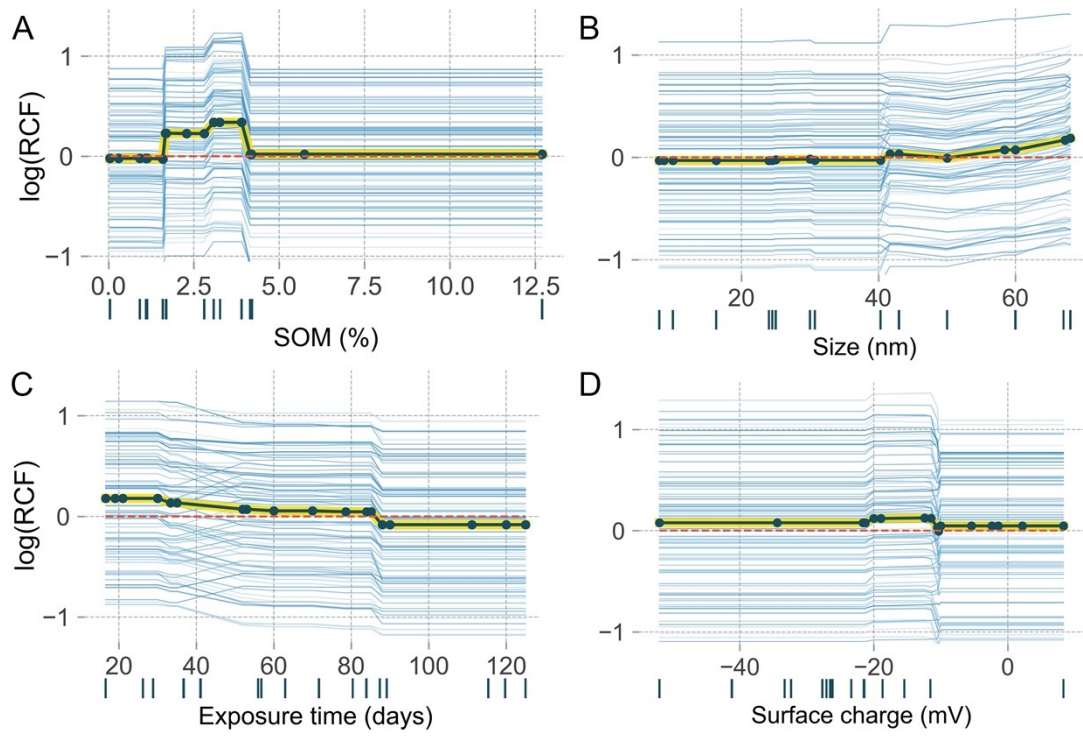

**Fig. S6** PDP and ICE plots of the last four relevant features correlating RCF.

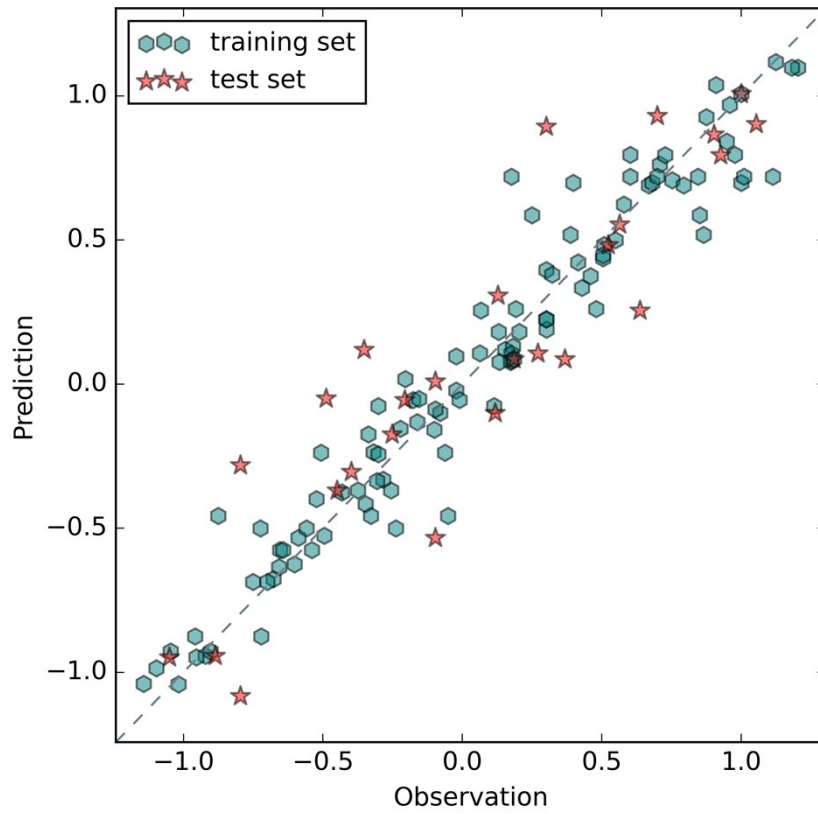

**Fig. S7** Predicted versus observed logarithm transform of RCF values of the RuleFit regression based on the sixth dataset split (stratified shuffle split).

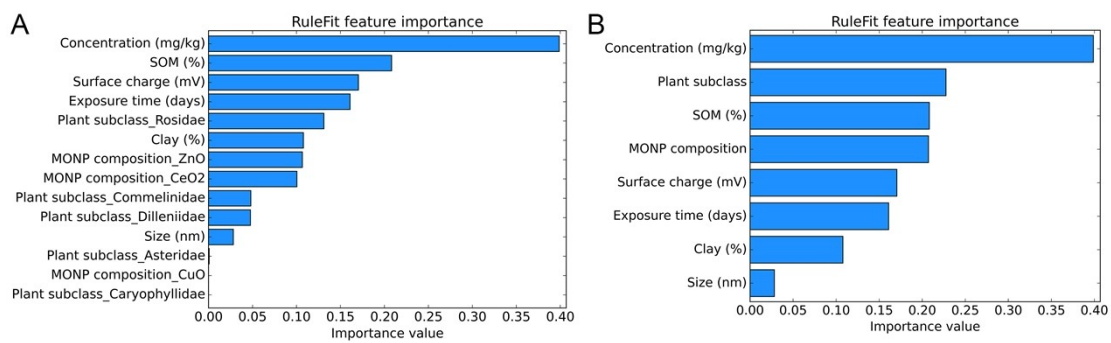

**Fig. S8** (A) Absolute feature importance of input features in the RuleFit regression. (B) Absolute feature importance of features by adding the importance of one-hot encoded features.
